# Supplementary material for: Autoantibody and Cytokine Profiles during Treatment with Belimumab in Patients with Systemic Lupus Erythematosus
Source: MDPI journal article supplement (doi:10.3390/ijms21103463), 2020-05-14
Supplement: s1 [file s1]

**Table S1.** Seroconversion of patients with undetectable cytokine or negative autoantibody or immune complex levels at baseline.

|                       | Undetectable or<br>negative at baseline | Month<br>3 | Month<br>6 | Month<br>12 | Month<br>24 |
|-----------------------|-----------------------------------------|------------|------------|-------------|-------------|
| <b>Cytokines</b>      |                                         |            |            |             |             |
| IFN- $\alpha$ 2       | 63                                      | 0          | 1          | 0           | 0           |
| IL-6                  | 62                                      | 1          | 2          | 2           | 0           |
| IL-10                 | 50                                      | 1          | 1          | 3           | 0           |
| IL-17A                | 72                                      | 3          | 1          | 0           | 1           |
| <b>Autoantibodies</b> |                                         |            |            |             |             |
| Anti-dsDNA            | 32                                      | 0          | 1          | 3           | 0           |
| Anti-ribosomal P      | 63                                      | 1          | 0          | 1           | 1           |
| Anti-histone          | 59                                      | 0          | 0          | 3           | 2           |
| Anti-Sm               | 58                                      | 0          | 0          | 1           | 0           |
| Anti-U1RNP            | 43                                      | 0          | 3          | 2           | 0           |
| Anti-Sm-U1RNP         | 59                                      | 0          | 0          | 0           | 0           |
| Anti-Ro52/SSA         | 46                                      | 0          | 1          | 2           | 0           |
| Anti-Ro60/SSA         | 33                                      | 0          | 1          | 3           | 0           |
| Anti-La/SSB           | 59                                      | 0          | 0          | 1           | 0           |
| Anti-PCNA             | 72                                      | 0          | 0          | 0           | 0           |
| <b>Circulating IC</b> | 57                                      | 1          | 1          | 3           | 2           |

Numbers of patients with undetectable cytokine levels or negative autoantibody or immune complex levels at baseline who seroconverted to detectable cytokine levels or positive autoantibody levels, respectively, at later time points.

dsDNA: double stranded DNA; IFN: interferon; IC: immune complex; IL: interleukin; PCNA: proliferating cell nuclear antigen; Sm: Smith.
