# Supplementary material for: Autoantibody and Cytokine Profiles during Treatment with Belimumab in Patients with Systemic Lupus Erythematosus
Source: MDPI journal article supplement (doi:10.3390/ijms21103463), 2020-05-14
Supplement: s1 [file s1]

**Table S3.** Associations of changes in cytokine, autoantibody and IC levels between baseline and month 3 with treatment outcome.

| Sustained outcomes | SRI-4                   |                        | cSLEDAI-2K=0            |                        | cSLEDAI-2K=0 & prednisone eq. ≤7.5 mg/day |                        | LLDAS   |   |
|--------------------|-------------------------|------------------------|-------------------------|------------------------|-------------------------------------------|------------------------|---------|---|
| Variables          | +                       | -                      | +                       | -                      | +                                         | -                      | +       | - |
|                    | P value                 |                        | P value                 |                        | P value                                   |                        | P value |   |
| Cytokines          |                         |                        |                         |                        |                                           |                        |         |   |
| IFN-α2             | 0.176                   |                        | 0.113                   |                        | 0.179                                     |                        | 0.074   |   |
| IL-6*              | 0.0; -0.8<br>(0.0; 0.0) | 0.0; 1.8<br>(0.0; 0.0) | 0.0; -1.0<br>(0.0; 0.0) | 0.0; 1.1<br>(0.0; 0.0) | 0.0; -1.1<br>(0.0; 0.0)                   | 0.0; 0.9<br>(0.0; 0.0) | 0.170   |   |
|                    | 0.043                   |                        | 0.004                   |                        | 0.017                                     |                        |         |   |
| IL-10              | 0.547                   |                        | 0.834                   |                        | 0.743                                     |                        | 0.691   |   |
| IL-17A             | 0.295                   |                        | 0.660                   |                        | 0.868                                     |                        | 0.096   |   |
| Autoantibodies     |                         |                        |                         |                        |                                           |                        |         |   |
| Anti-dsDNA         | 0.165                   |                        | 0.843                   |                        | 0.855                                     |                        | 0.692   |   |
| Anti-ribosomal P   | 0.959                   |                        | -1.3<br>(-11.1; 0.0)    | -1.0<br>(-18.0; -0.2)  | 0.103                                     |                        | 0.099   |   |
|                    |                         |                        | 0.037                   |                        |                                           |                        |         |   |
| Anti-histone       | 0.929                   |                        | 0.925                   |                        | 0.524                                     |                        | 0.591   |   |
| Anti-Sm            | 0.759                   |                        | 0.484                   |                        | 0.085                                     |                        | 0.312   |   |
| Anti-U1RNP         | -4.7<br>(-14.2; -0.3)   | -0.2<br>(-3.1; 0.6)    | 0.157                   |                        | 0.289                                     |                        | 0.406   |   |
|                    | 0.033                   |                        |                         |                        |                                           |                        |         |   |
| Anti-Sm-U1RNP      | 0.267                   |                        | -0.1<br>(-5.5; 0.0)     | -1.5<br>(-9.0; -0.2)   | 0.051                                     |                        | 0.977   |   |
|                    |                         |                        | 0.044                   |                        |                                           |                        |         |   |
| Anti-Ro52/SSA      | 0.157                   |                        | 0.873                   |                        | 0.885                                     |                        | 0.902   |   |
| Anti-Ro60/SSA      | 0.610                   |                        | 0.713                   |                        | 0.196                                     |                        | 0.138   |   |
| Anti-La/SSB        | 0.251                   |                        | 0.439                   |                        | 0.596                                     |                        | 0.160   |   |
| Circulating IC     | 0.074                   |                        | 0.775                   |                        | 0.398                                     |                        | 0.516   |   |

P values derived from comparisons of changes in cytokine (pg/mL), autoantibody (AU or IU/mL) and IC ( $\mu$ g Eq/mL) levels between baseline and month 3 ( $\Delta_{(\text{month 3} - \text{baseline})}$ ) between patients who attained and patients who did not attain sustained SRI-4, cSLEDAI-2K = 0, cSLEDAI-2K = 0 & prednisone equivalent dose  $\leq 7.5$  mg/day, and LLDAS, using Mann-Whitney *U* test. Distributions of variables are presented as medians (25<sup>th</sup> percentile; 75<sup>th</sup> percentile) in cases of significant P values. Light grey shadows indicate statistically significant associations between  $\Delta$ s and the respective outcome.

\* For IL-6, means are also provided to determine the direction and magnitude of the change due to zero median values.

cSLEDAI-2K: clinical Systemic Lupus Erythematosus Disease Activity Index 2000; dsDNA: double stranded DNA; IFN: interferon; IC: immune complex; IL: interleukin; LLDAS: Lupus Low Disease Activity State; PCNA: proliferating cell nuclear antigen; Sm: Smith.
