# Supplementary material for: Autoantibody and Cytokine Profiles during Treatment with Belimumab in Patients with Systemic Lupus Erythematosus
Source: MDPI journal article supplement (doi:10.3390/ijms21103463), 2020-05-14
Supplement: s1 [file s1]

**Table S4.** Associations of changes in cytokine, autoantibody and IC levels between baseline and month 6 with treatment outcome.

| Sustained outcomes | SRI-4   |   | cSLEDAI-2K=0         |                       | cSLEDAI-2K=0 & prednisone eq. ≤7.5 mg/day |                      | LLDAS                |                       |
|--------------------|---------|---|----------------------|-----------------------|-------------------------------------------|----------------------|----------------------|-----------------------|
| Variables          | +       | - | +                    | -                     | +                                         | -                    | +                    | -                     |
|                    | P value |   | P value              |                       | P value                                   |                      | P value              |                       |
| Cytokines          |         |   |                      |                       |                                           |                      |                      |                       |
| IFN-α2             | 1.000   |   | 0.397                |                       | 0.356                                     |                      | 0.716                |                       |
| IL-6               | 0.216   |   | 0.172                |                       | 0.147                                     |                      | 0.149                |                       |
| IL-10              | 0.957   |   | 0.358                |                       | 0.269                                     |                      | 0.541                |                       |
| IL-17A             | 0.894   |   | 0.622                |                       | 0.638                                     |                      | 0.517                |                       |
| Autoantibodies     |         |   |                      |                       |                                           |                      |                      |                       |
| Anti-dsDNA         | 0.362   |   | 0.612                |                       | 0.876                                     |                      | 0.198                |                       |
| Anti-ribosomal P   | 0.669   |   | 0.717                |                       | 0.950                                     |                      | 0.064                |                       |
| Anti-histone       | 0.206   |   | 0.852                |                       | 0.876                                     |                      | -0.8<br>(-2.6; -0.1) | -6.2<br>(-19.6; -0.6) |
|                    |         |   |                      |                       |                                           |                      | 0.031                |                       |
| Anti-Sm            | 0.391   |   | 0.192                |                       | 0.160                                     |                      | -0.1<br>(-3.5; 0.9)  | -1.0<br>(-25.8; -0.2) |
|                    |         |   |                      |                       |                                           |                      | 0.013                |                       |
| Anti-U1RNP         | 0.453   |   | -0.5<br>(-6.6; -0.1) | -5.1<br>(-31.4; -0.2) | 0.072                                     |                      | 0.341                |                       |
|                    |         |   | 0.040                |                       |                                           |                      |                      |                       |
| Anti-Sm-U1RNP      | 0.061   |   | 0.069                |                       | 0.124                                     |                      | -0.2<br>(-5.3; 0.1)  | -3.3<br>(-15.4; -0.4) |
|                    |         |   |                      |                       |                                           |                      | 0.038                |                       |
| Anti-Ro52/SSA      | 0.138   |   | 0.649                |                       | 0.678                                     |                      | 0.594                |                       |
| Anti-Ro60/SSA      | 0.105   |   | 0.066                |                       | -0.5<br>(-2.8; 1.9)                       | -2.7<br>(-7.0; -0.2) | -0.2<br>(-3.3; 2.1)  | -2.8<br>(-7.1; -1.0)  |
|                    |         |   |                      |                       | 0.031                                     |                      | 0.011                |                       |
| Anti-La/SSB        | 0.238   |   | 0.357                |                       | 0.454                                     |                      | 0.0<br>(-1.2; 0.3)   | -0.9<br>(-3.7; -0.1)  |
|                    |         |   |                      |                       |                                           |                      | 0.028                |                       |
| Circulating IC     | 0.138   |   | 0.381                |                       | 0.599                                     |                      | 0.437                |                       |

P values derived from comparisons of changes in cytokine (pg/mL), autoantibody (AU or IU/mL) and IC ( $\mu$ g Eq/mL) levels between baseline and month 6 ( $\Delta_{(\text{month 6} - \text{baseline})}$ ) between patients who attained and patients who did not attain sustained SRI-4, cSLEDAI-2K = 0, cSLEDAI-2K = 0 & prednisone equivalent dose  $\leq 7.5$  mg/day, and LLDAS, using Mann-Whitney *U* test. Distributions of variables are presented as medians (25<sup>th</sup> percentile; 75<sup>th</sup> percentile) in cases of significant P values. Light grey shadows indicate statistically significant associations between  $\Delta$ s and the respective outcome.

cSLEDAI-2K: clinical Systemic Lupus Erythematosus Disease Activity Index 2000; dsDNA: double stranded DNA; IFN: interferon; IC: immune complex; IL: interleukin; LLDAS: Lupus Low Disease Activity State; PCNA: proliferating cell nuclear antigen; Sm: Smith.
