# Supplementary material for: Autoantibody and Cytokine Profiles during Treatment with Belimumab in Patients with Systemic Lupus Erythematosus
Source: MDPI journal article supplement (doi:10.3390/ijms21103463), 2020-05-14
Supplement: s1 [file s1]

**Table S2.** Proportions of responders among patients with undetectable cytokine or negative autoantibody or immune complex levels at baseline.

| Sustained outcomes    | SRI-4         | cSLEDAI-2K=0  | cSLEDAI-2K=0 & prednisone eq. $\leq 7.5$ mg/day | LLDAS         |
|-----------------------|---------------|---------------|-------------------------------------------------|---------------|
| <b>Cytokines</b>      |               |               |                                                 |               |
| IFN- $\alpha$ 2       | 31/46 (67.4%) | 24/54 (44.4%) | 19/54 (35.2%)                                   | 29/54 (53.7%) |
| IL-6                  | 27/44 (61.4%) | 21/52 (40.4%) | 17/52 (32.7%)                                   | 25/52 (48.1%) |
| IL-10                 | 24/36 (66.7%) | 18/43 (41.9%) | 13/43 (30.2%)                                   | 23/43 (53.5%) |
| IL-17A                | 36/55 (65.5%) | 26/63 (41.3%) | 21/63 (33.3%)                                   | 32/63 (50.8%) |
| <b>Autoantibodies</b> |               |               |                                                 |               |
| Anti-dsDNA            | 13/24 (54.2%) | 13/28 (46.4%) | 10/28 (35.7%)                                   | 15/28 (53.6%) |
| Anti-ribosomal P      | 33/46 (71.7%) | 25/53 (47.2%) | 20/53 (37.7%)                                   | 30/53 (56.6%) |
| Anti-histone          | 27/42 (64.3%) | 21/50 (42.0%) | 17/50 (34.0%)                                   | 28/50 (56.0%) |
| Anti-Sm               | 28/46 (60.9%) | 23/49 (46.9%) | 20/49 (40.8%)                                   | 26/49 (53.1%) |
| Anti-U1RNP            | 20/35 (57.1%) | 19/39 (48.7%) | 16/39 (41.0%)                                   | 17/39 (43.6%) |
| Anti-Sm-U1RNP         | 28/46 (60.9%) | 23/51 (45.1%) | 19/51 (37.3%)                                   | 26/51 (51.0%) |
| Anti-Ro52/SSA         | 24/37 (64.9%) | 19/41 (46.3%) | 16/41 (39.0%)                                   | 22/41 (53.7%) |
| Anti-Ro60/SSA         | 17/26 (65.4%) | 13/29 (44.8%) | 11/29 (37.9%)                                   | 15/29 (51.7%) |
| Anti-La/SSB           | 29/45 (64.4%) | 21/51 (41.2%) | 17/51 (33.3%)                                   | 25/51 (49.0%) |
| <b>Circulating IC</b> | 25/41 (61.0%) | 21/49 (42.9%) | 16/49 (32.7%)                                   | 28/49 (57.1%) |

Numbers (percentage) of patients with undetectable cytokine levels or negative autoantibody or immune complex levels at baseline who achieved sustained SRI-4, cSLEDAI-2K = 0, cSLEDAI-2K = 0 & prednisone equivalent dose  $\leq 7.5$  mg/day, and LLDAS.

cSLEDAI-2K: clinical Systemic Lupus Erythematosus Disease Activity Index 2000; dsDNA: double stranded DNA; IFN: interferon; IC: immune complex; IL: interleukin; LLDAS: Lupus Low Disease Activity State; PCNA: proliferating cell nuclear antigen; Sm: Smith.
