# Supplementary material for: Autoantibody and Cytokine Profiles during Treatment with Belimumab in Patients with Systemic Lupus Erythematosus
Source: Int J Mol Sci. 2020 May 14;21(10):3463. doi: 10.3390/ijms21103463 (PMC7278961; doi:10.3390/ijms21103463)
Supplement: Supplementary file 1 [file ijms-21-03463-s001.zip]

Archive with 11 entries (11 files):
- Figure S1.eps
- __MACOSX/._Figure S1.eps
- Supplementary Table S1.pdf
- __MACOSX/._Supplementary Table S1.pdf
- Supplementary Table S2.pdf
- __MACOSX/._Supplementary Table S2.pdf
- Supplementary Table S3.pdf
- __MACOSX/._Supplementary Table S3.pdf
- Supplementary Table S4.pdf
- __MACOSX/._Supplementary Table S4.pdf
- Figure S1 caption.pdf
